# Supplementary material
Source: PubMed Central journal article supplement (PMC3993685)
Supplement: JCM.00100-14_zjm999093336so1.pdf [file JCM.00100-14_zjm999093336so1.pdf]

**Table S1. Interlaboratory proficiency testing by positive and negative proficiency testing results**

| LABORATORY | Proficiency testing HC2 results | HC2 results of origin |          | TOTAL | Analysis of agreement |      |
|------------|---------------------------------|-----------------------|----------|-------|-----------------------|------|
|            |                                 | NEGATIVE              | POSITIVE |       |                       |      |
| A          | NEGATIVE                        | 37                    | 4        | 41    | Kappa                 | 0.85 |
|            | POSITIVE                        | 2                     | 38       | 40    |                       |      |
|            | Total                           | 39                    | 42       | 81    |                       |      |
| B          | NEGATIVE                        | 34                    | 1        | 35    | Kappa                 | 0.92 |
|            | POSITIVE                        | 2                     | 40       | 42    |                       |      |
|            | Total                           | 36                    | 41       | 77    |                       |      |
| C          | NEGATIVE                        | 38                    | 2        | 40    | Kappa                 | 0.90 |
|            | POSITIVE                        | 2                     | 39       | 41    |                       |      |
|            | Total                           | 40                    | 41       | 81    |                       |      |
| D          | NEGATIVE                        | 35                    | 5        | 40    | Kappa                 | 0.88 |
|            | POSITIVE                        | 0                     | 43       | 43    |                       |      |
|            | Total                           | 35                    | 48       | 83    |                       |      |
| E          | NEGATIVE                        | 23                    | 4        | 27    | Kappa                 | 0.84 |
|            | POSITIVE                        | 0                     | 24       | 24    |                       |      |
|            | Total                           | 23                    | 28       | 51    |                       |      |
| F          | NEGATIVE                        | 35                    | 1        | 36    | Kappa                 | 0.90 |
|            | POSITIVE                        | 3                     | 39       | 42    |                       |      |
|            | Total                           | 38                    | 40       | 78    |                       |      |
| G          | NEGATIVE                        | 38                    | 0        | 38    | Kappa                 | 0.95 |
|            | POSITIVE                        | 2                     | 40       | 42    |                       |      |
|            | Total                           | 40                    | 40       | 80    |                       |      |
| H          | NEGATIVE                        | 37                    | 1        | 38    | Kappa                 | 0.90 |
|            | POSITIVE                        | 3                     | 38       | 41    |                       |      |
|            | Total                           | 40                    | 39       | 79    |                       |      |
| I          | NEGATIVE                        | 37                    | 2        | 39    | Kappa                 | 0.92 |
|            | POSITIVE                        | 1                     | 39       | 40    |                       |      |
|            | Total                           | 38                    | 41       | 79    |                       |      |
| J          | NEGATIVE                        | 37                    | 1        | 38    | Kappa                 | 0.97 |
|            | POSITIVE                        | 0                     | 39       | 39    |                       |      |
|            | Total                           | 37                    | 40       | 77    |                       |      |
| K          | NEGATIVE                        | 35                    | 1        | 36    | Kappa                 | 0.95 |
|            | POSITIVE                        | 1                     | 43       | 44    |                       |      |
|            | Total                           | 36                    | 44       | 80    |                       |      |
| L          | NEGATIVE                        | 47                    | 3        | 50    | Kappa                 | 0.88 |
|            | POSITIVE                        | 3                     | 47       | 50    |                       |      |
|            | Total                           | 50                    | 50       | 100   |                       |      |

|       |          |     |     |     |       |      |
|-------|----------|-----|-----|-----|-------|------|
| TOTAL | NEGATIVE | 433 | 25  | 458 | Kappa | 0.91 |
|       | POSITIVE | 19  | 469 | 488 |       |      |
|       | Total    | 452 | 494 | 946 |       |      |

HC2: Hybrid Caputure 2. Kappa values: 0.00 to 0.20 slight agreement, 0.21 to 0.40 fair agreement, 0.41 to 0.60 moderate agreement, 0.61 to 0.80 substantial agreement, and 0.81 to 1.00 almost perfect agreement.

**Table S2. Interlaboratory proficiency testing by RLU categories of HC2 results**

| LABORATORY | Proficiency testing<br>HC2 results | HC2 results of origin |            |           |        | TOTAL | Analysis of agreement          |  |
|------------|------------------------------------|-----------------------|------------|-----------|--------|-------|--------------------------------|--|
|            |                                    | RLU <0.5              | 0.5≤RLU <1 | 1≤RLU <10 | RLU≥10 |       |                                |  |
| A          | RLU <0.5                           | 23                    | 8          | 3         | 0      | 34    | Kappa 0.73<br><br>p-value 0.00 |  |
|            | 0.5≤RLU<1                          | 0                     | 6          | 1         | 0      | 7     |                                |  |
|            | 1≤RLU <10                          | 0                     | 2          | 15        | 0      | 17    |                                |  |
|            | RLU≥10                             | 0                     | 0          | 2         | 21     | 23    |                                |  |
|            | Total                              | 23                    | 16         | 21        | 21     | 81    |                                |  |
| B          | RLU <0.5                           | 20                    | 5          | 0         | 1      | 26    | Kappa 0.84<br><br>p-value 0.00 |  |
|            | 0.5≤RLU<1                          | 0                     | 9          | 0         | 0      | 9     |                                |  |
|            | 1≤RLU <10                          | 0                     | 2          | 20        | 1      | 23    |                                |  |
|            | RLU≥10                             | 0                     | 0          | 0         | 19     | 19    |                                |  |
|            | Total                              | 20                    | 16         | 20        | 21     | 77    |                                |  |
| C          | RLU <0.5                           | 17                    | 7          | 0         | 0      | 24    | Kappa 0.77<br><br>p-value 0.00 |  |
|            | 0.5≤RLU<1                          | 3                     | 11         | 2         | 0      | 16    |                                |  |
|            | 1≤RLU <10                          | 0                     | 2          | 18        | 0      | 20    |                                |  |
|            | RLU≥10                             | 0                     | 0          | 0         | 21     | 21    |                                |  |
|            | Total                              | 20                    | 20         | 20        | 21     | 81    |                                |  |
| D          | RLU <0.5                           | 24                    | 6          | 1         | 0      | 31    | Kappa 0.78<br><br>p-value 0.00 |  |
|            | 0.5≤RLU<1                          | 1                     | 4          | 4         | 0      | 9     |                                |  |
|            | 1≤RLU <10                          | 0                     | 0          | 22        | 1      | 23    |                                |  |
|            | RLU≥10                             | 0                     | 0          | 0         | 20     | 20    |                                |  |
|            | Total                              | 25                    | 10         | 27        | 21     | 83    |                                |  |
| E          | RLU <0.5                           | 14                    | 5          | 4         | 0      | 23    | Kappa 0.70<br><br>p-value 0.00 |  |
|            | 0.5≤RLU<1                          | 1                     | 3          | 0         | 0      | 4     |                                |  |
|            | 1≤RLU <10                          | 0                     | 0          | 8         | 0      | 8     |                                |  |
|            | RLU≥10                             | 0                     | 0          | 1         | 15     | 16    |                                |  |
|            | Total                              | 15                    | 8          | 13        | 15     | 51    |                                |  |
| F          | RLU <0.5                           | 21                    | 5          | 0         | 0      | 26    | Kappa 0.81<br><br>p-value 0.00 |  |
|            | 0.5≤RLU<1                          | 1                     | 8          | 1         | 0      | 10    |                                |  |
|            | 1≤RLU <10                          | 0                     | 3          | 18        | 0      | 21    |                                |  |
|            | RLU≥10                             | 0                     | 0          | 1         | 20     | 21    |                                |  |
|            | Total                              | 22                    | 16         | 20        | 20     | 78    |                                |  |
| G          | RLU <0.5                           | 18                    | 6          | 0         | 0      | 24    | Kappa 0.82                     |  |
|            | 0.5≤RLU<1                          | 2                     | 12         | 0         | 0      | 14    |                                |  |
|            | 1≤RLU <10                          | 0                     | 2          | 19        | 0      | 21    |                                |  |

|       |                  |     |     |     |     |     |         |      |
|-------|------------------|-----|-----|-----|-----|-----|---------|------|
|       | RLU $\geq$ 10    | 0   | 0   | 1   | 20  | 21  | p-value | 0.00 |
|       | Total            | 20  | 20  | 20  | 20  | 80  |         |      |
| H     | RLU <0.5         | 18  | 8   | 0   | 0   | 26  | Kappa   | 0.73 |
|       | 0.5 $\leq$ RLU<1 | 2   | 9   | 1   | 0   | 12  |         |      |
|       | 1 $\leq$ RLU <10 | 0   | 3   | 17  | 1   | 21  |         |      |
|       | RLU $\geq$ 10    | 0   | 0   | 1   | 19  | 20  | p-value | 0.00 |
|       | Total            | 20  | 20  | 19  | 20  | 79  |         |      |
| I     | RLU <0.5         | 20  | 6   | 1   | 0   | 27  | Kappa   | 0.83 |
|       | 0.5 $\leq$ RLU<1 | 0   | 11  | 1   | 0   | 12  |         |      |
|       | 1 $\leq$ RLU <10 | 0   | 1   | 17  | 0   | 18  |         |      |
|       | RLU $\geq$ 10    | 0   | 0   | 1   | 21  | 22  | p-value | 0.00 |
|       | Total            | 20  | 18  | 20  | 21  | 79  |         |      |
| J     | RLU <0.5         | 19  | 11  | 1   | 0   | 31  | Kappa   | 0.74 |
|       | 0.5 $\leq$ RLU<1 | 0   | 7   | 0   | 0   | 7   |         |      |
|       | 1 $\leq$ RLU <10 | 0   | 0   | 18  | 2   | 20  |         |      |
|       | RLU $\geq$ 10    | 0   | 0   | 1   | 18  | 19  | p-value | 0.00 |
|       | Total            | 19  | 18  | 20  | 20  | 77  |         |      |
| K     | RLU <0.5         | 24  | 6   | 1   | 0   | 31  | Kappa   | 0.84 |
|       | 0.5 $\leq$ RLU<1 | 0   | 5   | 0   | 0   | 5   |         |      |
|       | 1 $\leq$ RLU <10 | 0   | 1   | 20  | 1   | 22  |         |      |
|       | RLU $\geq$ 10    | 0   | 0   | 0   | 22  | 22  | p-value | 0.00 |
|       | Total            | 24  | 12  | 21  | 23  | 80  |         |      |
| L     | RLU <0.5         | 25  | 8   | 0   | 0   | 33  | Kappa   | 0.79 |
|       | 0.5 $\leq$ RLU<1 | 0   | 14  | 3   | 0   | 17  |         |      |
|       | 1 $\leq$ RLU <10 | 0   | 3   | 21  | 1   | 25  |         |      |
|       | RLU $\geq$ 10    | 0   | 0   | 1   | 24  | 25  | p-value | 0.00 |
|       | Total            | 25  | 25  | 25  | 25  | 100 |         |      |
| TOTAL | RLU <0.5         | 243 | 81  | 11  | 1   | 336 | Kappa   | 0.79 |
|       | 0.5 $\leq$ RLU<1 | 10  | 99  | 13  | 0   | 122 |         |      |
|       | 1 $\leq$ RLU <10 | 0   | 19  | 213 | 7   | 239 |         |      |
|       | RLU $\geq$ 10    | 0   | 0   | 9   | 240 | 249 | p-value | 0.00 |
|       | Total            | 253 | 199 | 246 | 248 | 946 |         |      |

HC2: Hybrid Caputure 2, RLU: relative light unit. Kappa values: 0.00 to 0.20 slight agreement, 0.21 to 0.40 fair agreement, 0.41 to 0.60 moderate agreement, 0.61 to 0.80 substantial agreement, and 0.81 to 1.00 almost perfect agreement.
